# Supplementary material
Source: Springer Nature journal article supplement (https://www.springermedizin.de/resource/supplementary/12916_2011_498_MOESM7_ESM.pdf/9598190)

A

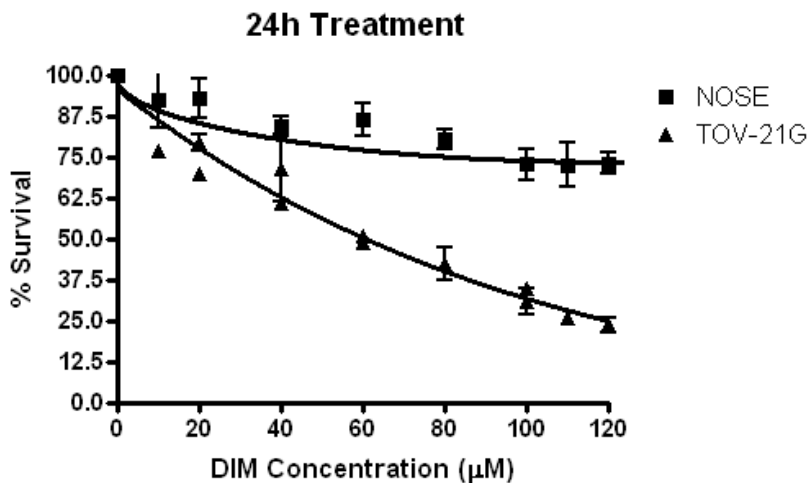

B

NOSE  
24 hours

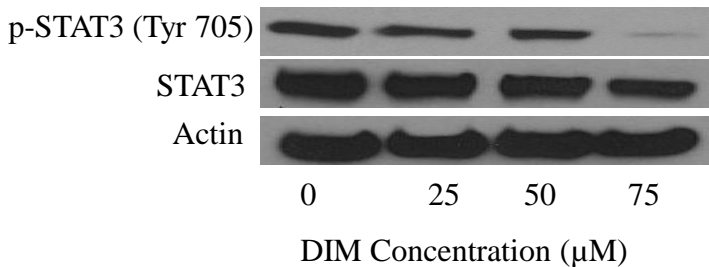

Supplement: MOESM7 [file 9598190]
